# Supplementary material for: A novel point-of-care diagnostic prototype system for the simultaneous electrochemiluminescent sensing of multiple traumatic brain injury biomarkers
Source: Royal Society of Chemistry journal article supplement (doi:10.1039/d3sd00090g), 2023-01-01
Supplement: d3sd00090g1.pdf [file d3sd00090g1.pdf]

## SUPPLEMENTARY INFORMATION (ESI)

### **A Novel Point-of-Care Diagnostic Prototype System for the Simultaneous Electrochemiluminescent Sensing of Multiple Traumatic Brain Injury Biomarkers**

Milica Jović,<sup>a</sup> Denis Prim,<sup>a</sup> Ophélie Righini,<sup>a</sup> David Tagan,<sup>b</sup> Mélanie Stäuble,<sup>a</sup> Marc Pignat,<sup>b</sup> Steve Gallay,<sup>b</sup> Martial Geiser<sup>c</sup> and Marc E. Pfeifer<sup>a\*</sup>

<sup>a</sup> Diagnostic Systems Research Group, Institute of Life Technologies, School of Engineering, University of Applied Sciences and Arts Western Switzerland (HES-SO Valais-Wallis), Rue de l'Industrie 23, 1950 Sion, Switzerland

<sup>b</sup> Institute of Systems Engineering, School of Engineering, University of Applied Sciences and Arts Western Switzerland (HES-SO Valais-Wallis), Rue de l'Industrie 23, 1950 Sion, Switzerland

<sup>c</sup> Y-YBAR, Rue de la Dixence 10, 1950 Sion, Switzerland

E-mail addresses: milica.jovic@hevs.ch (M. Jović); denis.prim@hevs.ch (D. Prim); ophelie.righini@hevs.ch (O. Righini); david.tagan@hevs.ch (D. Tagan); melanie.staeuble@master.hes-so.ch (M. Stäuble); marc.pignat@hevs.ch (M. Pignat); steve.gallay@hevs.ch (S. Gallay); martial.geiser@y-ybar.com (M. Geiser), marc.pfeifer@hevs.ch (M. Pfeifer).

\* Corresponding author: marc.pfeifer@hevs.ch (M. Pfeifer); Tel.: +41-58-606-86-61

|                                                                                                  |   |
|--------------------------------------------------------------------------------------------------|---|
| <b>SI-1:</b> Schematic representation of the prototype design.                                   | 2 |
| <b>SI-2:</b> CAD drawings of the prototype components.                                           | 3 |
| <b>SI-3:</b> Software interface.                                                                 | 4 |
| <b>SI-4:</b> Concept of the ECL microarray.                                                      | 5 |
| <b>SI-5:</b> Immunoassay conditions.                                                             | 6 |
| <b>SI-6:</b> Brief overview of recent publications reported on miniaturized ECL systems/devices. | 7 |
| <b>References</b>                                                                                | 9 |

SI-1: Schematic representation of the prototype design.

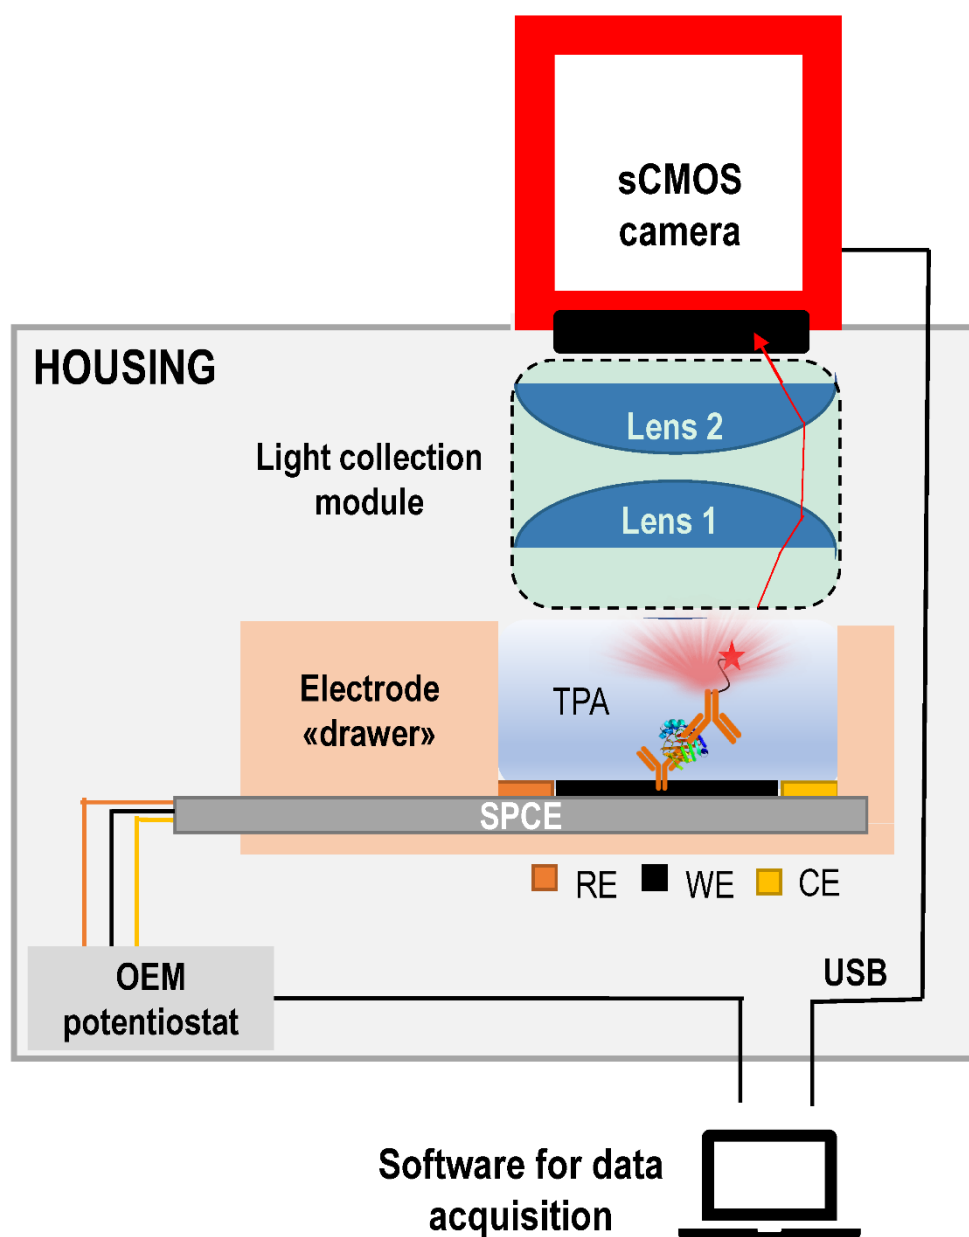

SI-2: CAD drawings of the prototype components.

|                                                                                         |                                                                                      |
|-----------------------------------------------------------------------------------------|--------------------------------------------------------------------------------------|
| <p>Prototype</p>                                                                        | 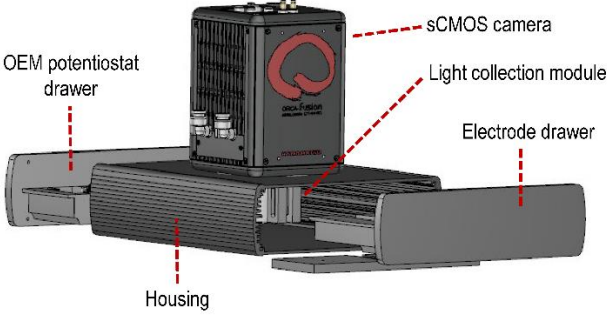   |
| <p>Housing (Main article, <b>Fig. 1A</b>)</p>                                           |    |
| <p>Electrode compartment (Main article, <b>Fig. 1B</b>)<br/>(top &amp; bottom part)</p> |   |
| <p>Potentiostat compartment (Main article, <b>Fig. 1C</b>)</p>                          |  |
| <p>Light collection module (Main article, <b>Fig. 1D</b>)</p>                           |  |

CAD drawings of prototype components fabricated at the Institute of Systems Engineering, School of Engineering, University of Applied Sciences and Arts Western Switzerland (HES-SO Valais-Wallis). Design and copyrights HES-SO Valais-Wallis.

SI-3: Software interface.

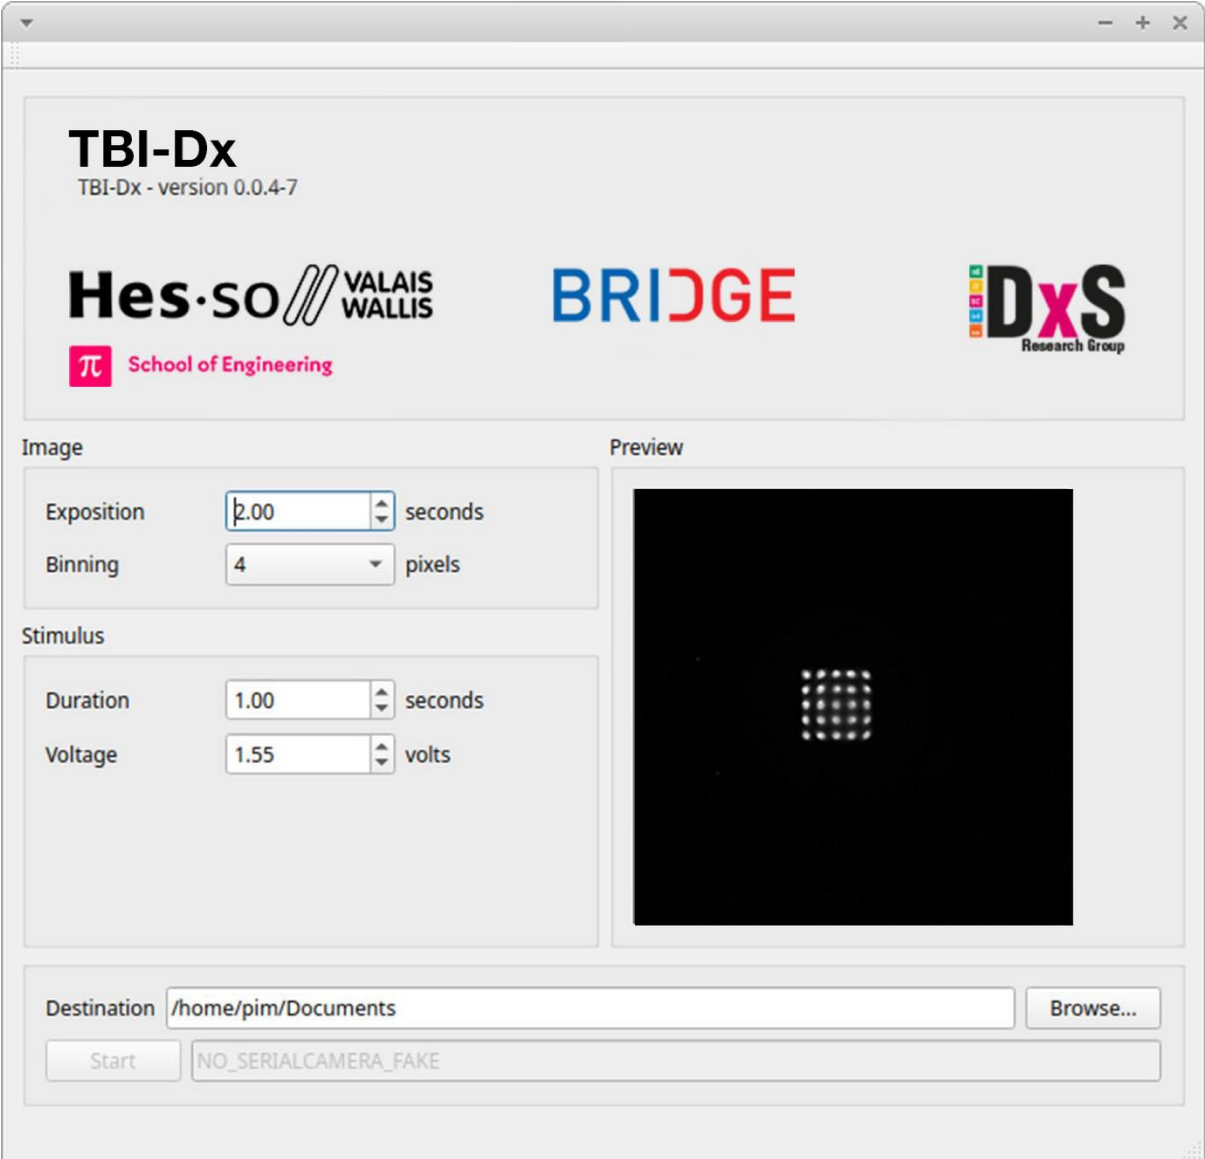

#### SI-4: Concept of the ECL microarray.

To conceptually show the advantage of the ECL microarray approach over conventional assays, an experiment was performed using a GFAP sandwich immunoassay (blank and 50 ng mL<sup>-1</sup>) where the same amount of capture antibodies was spotted on three different spots on SPCE: Spot 1 (12.56 mm<sup>2</sup>), Spot 2 (0.70 mm<sup>2</sup>), and Spot 3 (0.15 mm<sup>2</sup>). The amount of cAb in each spot was equal, while the cAb density/spot was increasing with the decreasing spot size.

The signal-to-blank (S/B) ratios were increasing with the increase of cAb density/spot (or decrease of the spot surface), in the order: Spot 1 > Spot 2 > Spot 3, confirming the advantage of the microarray approach over classical assays.

| Spot No.                     | Spot 1                   | Spot 2                    | Spot 3                     |
|------------------------------|--------------------------|---------------------------|----------------------------|
| Surface area of the spot     | 12.56 mm <sup>2</sup>    | 0.70 mm <sup>2</sup>      | 0.15 mm <sup>2</sup>       |
| Spotted volume of cAb        | 30'000 nL                | 126 nL                    | 14 nL                      |
| Number of drops              | 1                        | 360 drops x 350 pL        | 40 drops x 350 pL          |
| Spotted concentration of cAb | 0.05 µg mL <sup>-1</sup> | 11.11 µg mL <sup>-1</sup> | 100.00 µg mL <sup>-1</sup> |
| cAb amount/spot              | 1.40 ng                  | 1.40 ng                   | 1.40 ng                    |
| cAb density/spot             | 0.11 ng mm <sup>-2</sup> | 2.00 ng mm <sup>-2</sup>  | 9.33 ng mm <sup>-2</sup>   |

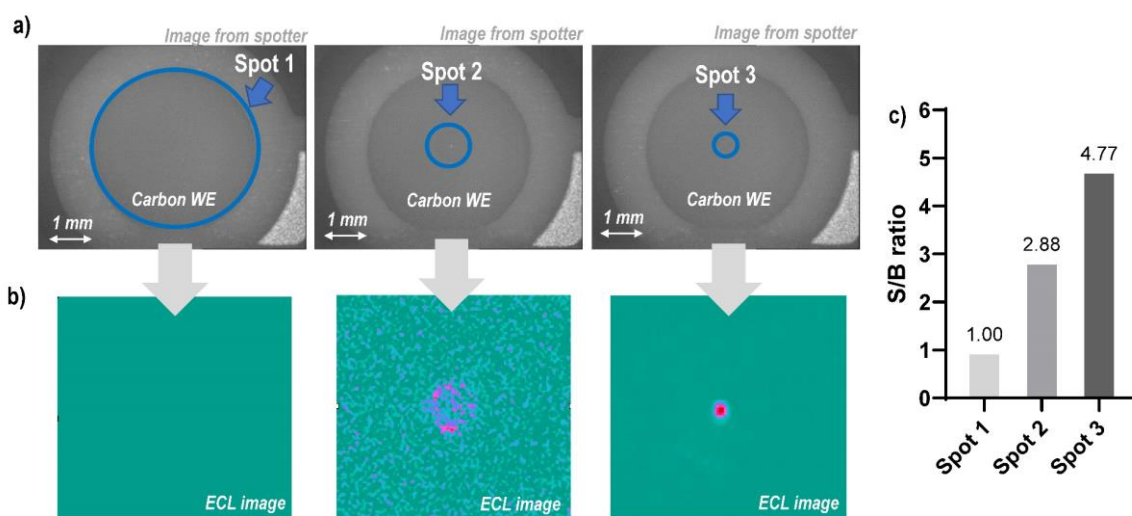

a) Photos of SPCEs with different spots of GFAP capture antibodies obtained with the camera from S3 contactless nano-spotting device Scienion AG. Blue circles represent the spot area on carbon working electrodes (WE); b) ECL images from SPCEs obtained for the GFAP sandwich immunoassay. Antigen concentrations were 0 and 50 ng mL<sup>-1</sup>. ECL signals were obtained using chronoamperometry at 1.55 V, and acquisition time of 15 seconds. ECL image was processed with Ice palette in ImageJ for easier observation of details. c) Signal-to-blank (S/B) ratios obtained for the GFAP sandwich assay from Spot 1, Spot 2, and Spot 3.

## SI-5: Immunoassay conditions.

### CRP singleplex assay

|                    |                                                     |
|--------------------|-----------------------------------------------------|
| cAb diluent        | PBS 1X + 5% v/v glycerol                            |
| cAb concentrations | 25 $\mu\text{g mL}^{-1}$                            |
| Blocking agent     | PBS 1X + 1% BSA                                     |
| Antigen diluent    | TRIS (pH 8.6) 50 mM + 1% BSA + 1 mM $\text{CaCl}_2$ |
| Wash buffer        | PBS 1X + 0.06% Tween-20                             |
| dAb diluent        | TRIS (pH 8.6) 50 mM + 1% BSA                        |
| dAb concentrations | 5 $\mu\text{g mL}^{-1}$                             |
| Read buffer        | MSD Read buffer T 2X                                |

### 3-plex assay (GFAP, h-FABP, S100 $\beta$ )

|                    |                                                       |
|--------------------|-------------------------------------------------------|
| cAb diluent        | PBS 1X + 1 mM $\text{CaCl}_2$ + 5% v/v glycerol       |
| cAb concentrations | 100 $\mu\text{g mL}^{-1}$                             |
| Blocking agent     | PBS 1X + 2% BSA + 1 mM $\text{CaCl}_2$                |
| Antigen diluent    | TRIS (pH 8.6) 50 mM + 0.1% BSA + 1 mM $\text{CaCl}_2$ |
| Wash buffer        | PBS 1X + 0.06% Tween-20                               |
| dAb diluent        | TRIS (pH 8.6) 50 mM + 0.1% BSA + 1 mM $\text{CaCl}_2$ |
| dAb concentrations | 5 $\mu\text{g mL}^{-1}$                               |
| Read buffer        | MSD Read buffer T 2X                                  |

## SI-6: Brief overview of recent publications reported on miniaturized ECL systems/devices.

*Note: Non-POC diagnostic type device publications were not considered.*

| Year | ECL system                                                                        | Detector             | Electrode                  | Analyte                       | LOD                       | Multianalyte detection | Ref. |
|------|-----------------------------------------------------------------------------------|----------------------|----------------------------|-------------------------------|---------------------------|------------------------|------|
| 2015 | Luminol/H <sub>2</sub> O <sub>2</sub><br>Ru(bpy) <sub>3</sub> <sup>2+</sup> /TPrA | CCD                  | BPE                        | TPrA                          | 8.7 μM                    | No                     | 1    |
|      |                                                                                   |                      |                            | H <sub>2</sub> O <sub>2</sub> | 46.6 μM                   |                        |      |
| 2016 | Luminol/H <sub>2</sub> O <sub>2</sub>                                             | Smartphone           | BPE/GOD                    | H <sub>2</sub> O <sub>2</sub> | 1.75 μM                   | No                     | 2    |
|      |                                                                                   |                      |                            | Glucose                       | 17 μM                     |                        |      |
| 2016 | Luminol/H <sub>2</sub> O <sub>2</sub><br>Ru(bpy) <sub>3</sub> <sup>2+</sup> /TPrA | CCD                  | BPE/GOD                    | TPrA                          | 1.265 μM                  | No                     | 3    |
|      |                                                                                   |                      |                            | H <sub>2</sub> O <sub>2</sub> | 27 μM                     |                        |      |
|      |                                                                                   |                      |                            | Glucose                       | 32 μM                     |                        |      |
| 2016 | Luminol/H <sub>2</sub> O <sub>2</sub><br>Ru(bpy) <sub>3</sub> <sup>2+</sup> /TPrA | CCD                  | BPE/GOD                    | TPrA                          | 85 μM                     | No                     | 4    |
|      |                                                                                   |                      |                            | H <sub>2</sub> O <sub>2</sub> | 24 μM                     |                        |      |
|      |                                                                                   |                      |                            | Glucose                       | 195 μM                    |                        |      |
| 2016 | Ru(bpy) <sub>3</sub> <sup>2+</sup> /TPrA                                          | CCD                  | Carbon                     | PSA                           | 0.3 pg mL <sup>-1</sup>   | Yes                    | 5    |
|      |                                                                                   |                      |                            | PSMA                          | 0.535 pg mL <sup>-1</sup> |                        |      |
|      |                                                                                   |                      |                            | PF-4                          | 0.42 pg mL <sup>-1</sup>  |                        |      |
| 2017 | Luminol/H <sub>2</sub> O <sub>2</sub>                                             | CCD                  | BPE/GOD                    | H <sub>2</sub> O <sub>2</sub> | 24 μM                     | No                     | 6    |
|      |                                                                                   |                      |                            | Glucose                       | 23 μM                     |                        |      |
| 2018 | Luminol/H <sub>2</sub> O <sub>2</sub>                                             | Smartphone           | SEES ITO                   | H <sub>2</sub> O <sub>2</sub> | 0.27 μM                   | No                     | 7    |
| 2019 | Luminol/H <sub>2</sub> O <sub>2</sub>                                             | PMT                  | SEES                       | H <sub>2</sub> O <sub>2</sub> | 0.26 μM                   | No                     | 8    |
| 2021 | Ru(bpy) <sub>3</sub> <sup>2+</sup> /TPrA                                          | Smartphone           | BPE                        | Dopamine                      | 2 μM                      | No                     | 9    |
|      | Luminol/H <sub>2</sub> O <sub>2</sub>                                             | Photomultiplier tube |                            | Choline                       | 1.25 μM                   |                        |      |
| 2021 | Luminol/H <sub>2</sub> O <sub>2</sub>                                             | Smartphone           | BPE/GOD                    | H <sub>2</sub> O <sub>2</sub> | 5.87 μM                   | No                     | 10   |
|      |                                                                                   |                      |                            | Glucose                       | 0.138 μM                  |                        |      |
| 2021 | Luminol/H <sub>2</sub> O <sub>2</sub>                                             | Smartphone           | Laser-induced graphene SE  | H <sub>2</sub> O <sub>2</sub> | 1.71 μM                   | No                     | 11   |
|      |                                                                                   |                      |                            | Glucose                       | 3.76 μM                   |                        |      |
|      |                                                                                   |                      |                            | Xanthine                      | 1.25 μM                   |                        |      |
|      |                                                                                   |                      |                            | Dopamine                      | 3.40 μM                   |                        |      |
| 2021 | Luminol/H <sub>2</sub> O <sub>2</sub>                                             | Smartphone           | Laser-induced graphene BPE | H <sub>2</sub> O <sub>2</sub> | 4.36 μM                   | No                     | 12   |
|      |                                                                                   |                      |                            | Glucose                       | 2.51 μM                   |                        |      |
|      |                                                                                   |                      |                            | Choline                       | 4.01 μM                   |                        |      |
|      |                                                                                   |                      |                            | Lactate                       | 5.32 μM                   |                        |      |
| 2021 | Luminol/H <sub>2</sub> O <sub>2</sub><br>Luminol/O <sub>2</sub>                   | Smartphone           | BPE                        | H <sub>2</sub> O <sub>2</sub> | 0.069 μM                  | No                     | 13   |
|      |                                                                                   |                      |                            | O <sub>2</sub>                | 0.15 mg L <sup>-1</sup>   |                        |      |
|      |                                                                                   |                      |                            | CO <sub>2</sub>               | 0.45 mg L <sup>-1</sup>   |                        |      |
|      |                                                                                   |                      |                            | Glucose                       | 0.31 μM                   |                        |      |
| 2021 | Luminol/H <sub>2</sub> O <sub>2</sub>                                             | Smartphone           | BPE                        | Vitamin B12                   | 0.109 μM*                 | Yes                    | 14   |
|      |                                                                                   |                      |                            | Vitamin C                     | 0.96 μM*                  |                        |      |
| 2022 | Ru(bpy) <sub>3</sub> <sup>2+</sup> /TPrA                                          | Silicon PM module    | ITO/SNM                    | Dopamine                      | 0.0035 μM                 | No                     | 15   |
| 2022 | IrpiqSQ/Procell                                                                   | PMT                  | SPCE                       | CRP                           | 4.2 μM                    | No                     | 16   |
| 2022 | Luminol/H <sub>2</sub> O <sub>2</sub>                                             | CMOS                 | SEES                       | Uric acid                     | 26.09 μM                  | No                     | 17   |
| 2022 | Luminol/H <sub>2</sub> O <sub>2</sub>                                             | PMT                  | Graphene-based SE          | Lactate                       | 6.47 μM                   | No                     | 18   |
|      |                                                                                   | Smartphone           |                            |                               |                           |                        |      |
| 2022 | Luminol/H <sub>2</sub> O <sub>2</sub>                                             | Smartphone           | BPE                        | Glucose                       | 24 μM                     | Yes                    | 19   |
|      |                                                                                   |                      |                            | Choline                       | 10 μM                     |                        |      |
| 2023 | Luminol/H <sub>2</sub> O <sub>2</sub>                                             | Smartphone           | Carbon black-doped PLA     | Glucose                       | 60 μM                     | No                     | 20   |

|      |                                          |            |                          |                         |                                                                               |     |           |
|------|------------------------------------------|------------|--------------------------|-------------------------|-------------------------------------------------------------------------------|-----|-----------|
| 2023 | Luminol/H <sub>2</sub> O <sub>2</sub>    | Smartphone | Graphite pencil-based SE | Cholesterol             | 15.71 μM                                                                      | No  | 21        |
| 2023 | Ru(bpy) <sub>3</sub> <sup>2+</sup> /TPrA | sCMOS      | SPCE                     | h-FABP<br>GFAP<br>S100β | 237 pg mL <sup>-1</sup><br>742 pg mL <sup>-1</sup><br>583 pg mL <sup>-1</sup> | Yes | This work |

**Abbreviations:** BPE – bipolar electrode; CRP – C reactive protein; GOD – glucose oxidase; IrpiqSQ - [Ir(piq)<sub>2</sub>(pt-TOxT-Sq)]Cl where piq = 2-phenyl-iso-quinoline, and pt-TOxT-Sq = a pyridyltriazole ligand with trioxatridecane chain and squarate amide ethyl ester); ITO – indium tin oxide; PM – photomultiplier; PMT – photomultiplier tube; PF-4 – platelet factor-4 ; PLA – polylactic acid electrodes; PSA – prostate specific antigen ; PSMA – prostate specific membrane antigen ; SE – single electrode; SEES – single electrode electrochemical system; SNM – silica nanoporous membrane; SPCE – screen printed carbon electrode. \*LOD for individual detection.



## References

- 1 R. Liu, C. Zhang and M. Liu, *Sensors and Actuators B: Chemical*, 2015, **216**, 255–262.
- 2 L. Chen, C. Zhang and D. Xing, *Sensors and Actuators B: Chemical*, 2016, **237**, 308–317.
- 3 W. Guan, M. Liu and C. Zhang, *Biosensors and Bioelectronics*, 2016, **75**, 247–253.
- 4 M. Liu, R. Liu, D. Wang, C. Liu and C. Zhang, *Lab Chip*, 2016, **16**, 2860–2870.
- 5 K. Kadimisetty, I. M. Mosa, S. Malla, J. E. Satterwhite-Warden, T. M. Kuhns, R. C. Faria, N. H. Lee and J. F. Rusling, *Biosensors and Bioelectronics*, 2016, **77**, 188–193.
- 6 M. Liu, D. Wang, C. Liu, R. Liu, H. Li and C. Zhang, *Sensors and Actuators B: Chemical*, 2017, **246**, 327–335.
- 7 W. Gao, K. Muzyka, X. Ma, B. Lou and G. Xu, *Chem. Sci.*, 2018, **9**, 3911–3916.
- 8 X. Ma, L. Qi, W. Gao, F. Yuan, Y. Xia, B. Lou and G. Xu, *Electrochimica Acta*, 2019, **308**, 20–24.
- 9 M. Bhaiyya, M. B. Kulkarni, P. K. Pattnaik and S. Goel, *Luminescence*, 2022, **37**, 357–365.
- 10 M. Bhaiyya, P. Rewatkar, M. Salve, P. K. Pattnaik and S. Goel, *IEEE Transactions on NanoBioscience*, 2021, **20**, 79–85.
- 11 M. L. Bhaiyya, P. K. Pattnaik and S. Goel, *IEEE Transactions on Instrumentation and Measurement*, 2021, **70**, 1–8.
- 12 M. Bhaiyya, P. K. Pattnaik and S. Goel, *IEEE Transactions on Electron Devices*, 2021, **68**, 2447–2454.
- 13 M. Salve, A. Mandal, K. Amreen, B. V. V. S. N. P. Rao, P. K. Pattnaik and S. Goel, *IEEE Transactions on Instrumentation and Measurement*, 2021, **70**, 1–10.
- 14 M. Bhaiyya, P. K. Pattnaik and S. Goel, *Sensors and Actuators A: Physical*, 2021, **331**, 112831.
- 15 L. Zhu, W. Fu, J. Chen, S. Li, X. Xie, Z. Zhang, J. Liu, L. Zhou, B. Su and X. Chen, *Sensors and Actuators B: Chemical*, 2022, **366**, 131972.
- 16 L. D’Alton, S. Carrara, G. J. Barbante, D. Hoxley, D. J. Hayne, P. S. Francis and C. F. Hogan, *Bioelectrochemistry*, 2022, **146**, 108107.
- 17 R. Abbasi, J. Liu, S. Suarasan and S. Wachsmann-Hogiu, *Lab Chip*, 2022, **22**, 994–1005.
- 18 M. Bhaiyya, P. Rewatkar, P. K. Pattnaik and S. Goel, *J. Micromech. Microeng.*, 2022, **33**, 024001.
- 19 M. Bhaiyya, P. K. Pattnaik and S. Goel, *Microchim Acta*, 2022, **189**, 79.
- 20 D. Calabria, E. Lazzarini, A. Pace, I. Trozzi, M. Zangheri, S. Cinti, M. Difonzo, G. Valenti, M. Guardigli, F. Paolucci and M. Mirasoli, *Biosensors and Bioelectronics*, 2023, **227**, 115146.
- 21 M. Bhaiyya, P. S. Kumar, P. K. Pattnaik, K. Shankar and S. Goel, *IEEE Sensors Journal*, 2023, **23**, 750–757.
